# Supplementary material for: Ancient DNA reveals genetic connections between early Di-Qiang and Han Chinese
Source: PubMed Central journal article supplement (PMC5716020; doi:10.1186/s12862-017-1082-0), 2017-12-04

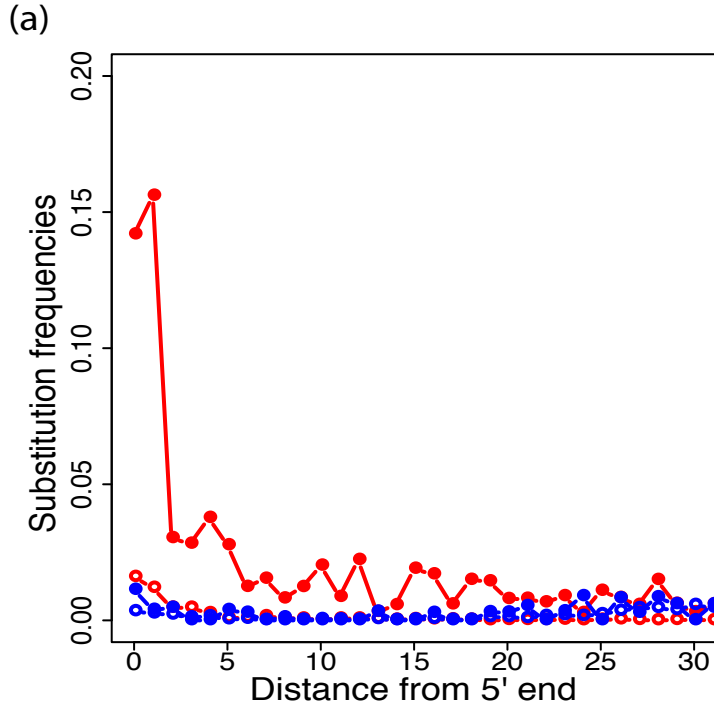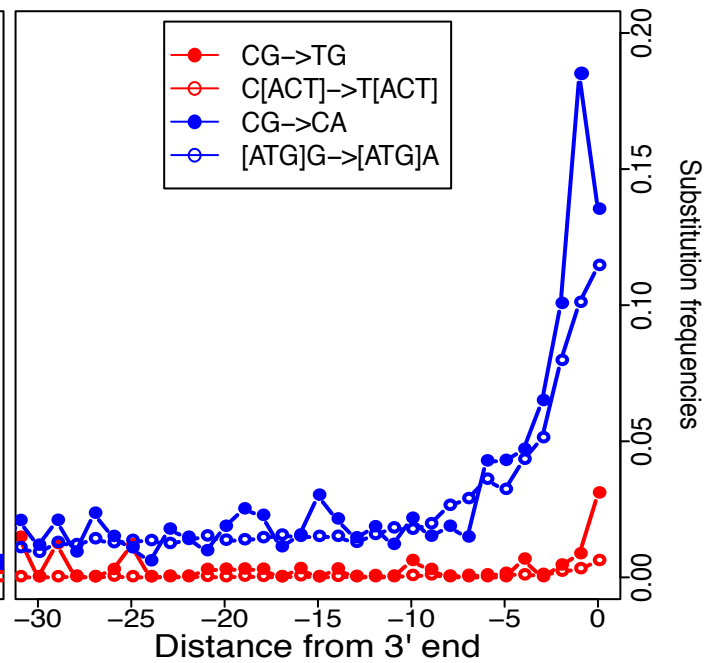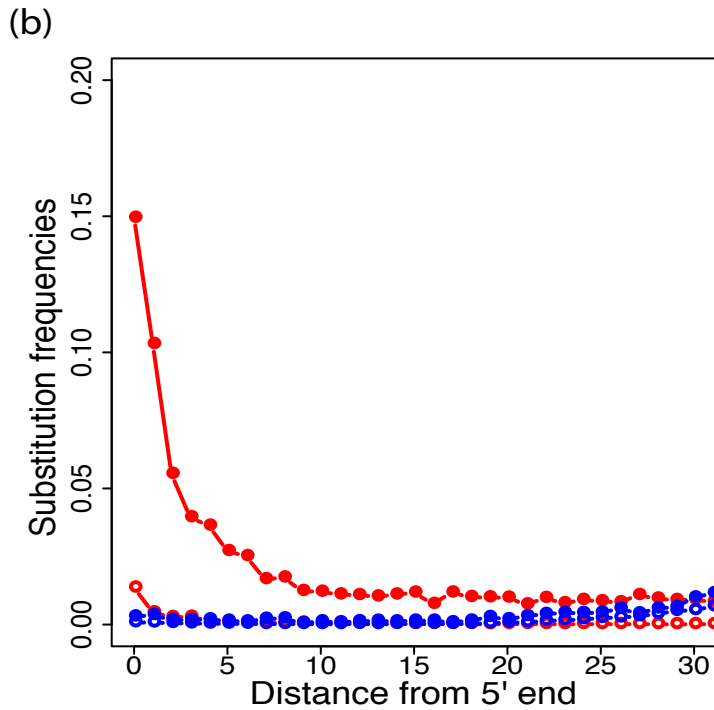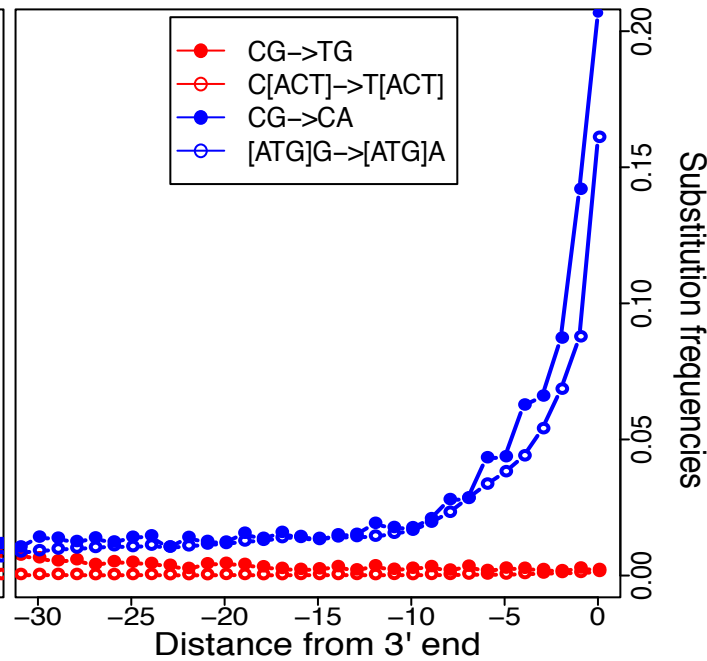

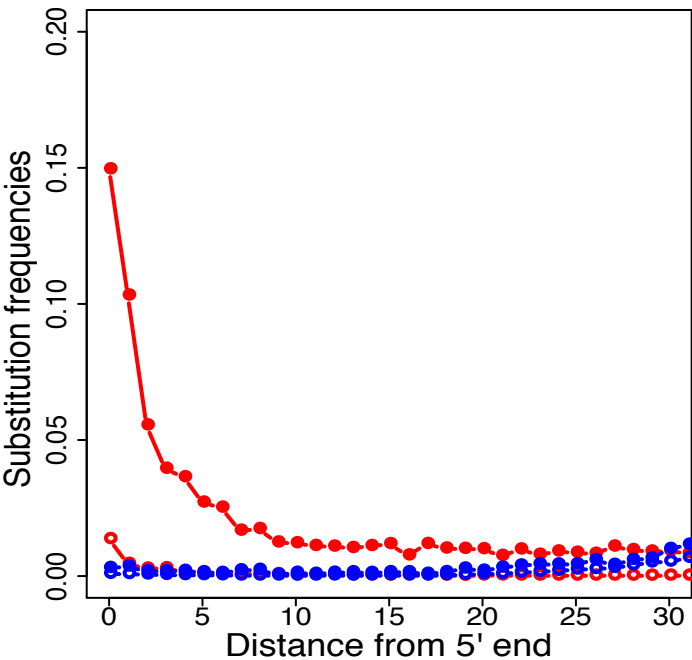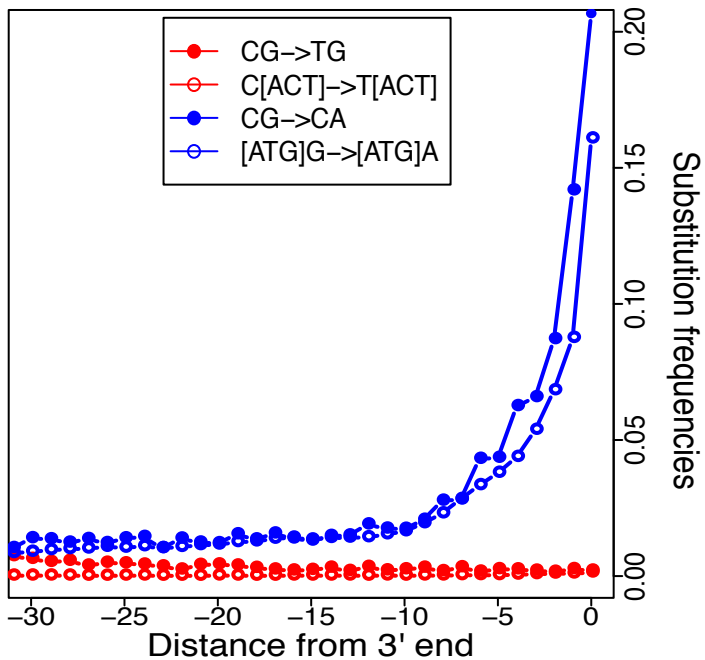

Supplement: 12862_2017_1082_MOESM3_ESM.pdf [file 12862_2017_1082_MOESM3_ESM.pdf]
