# Supplementary material for: Ancient DNA reveals genetic connections between early Di-Qiang and Han Chinese
Source: PubMed Central journal article supplement (PMC5716020; doi:10.1186/s12862-017-1082-0), 2017-12-04

(a)

Total fragments (MG18)

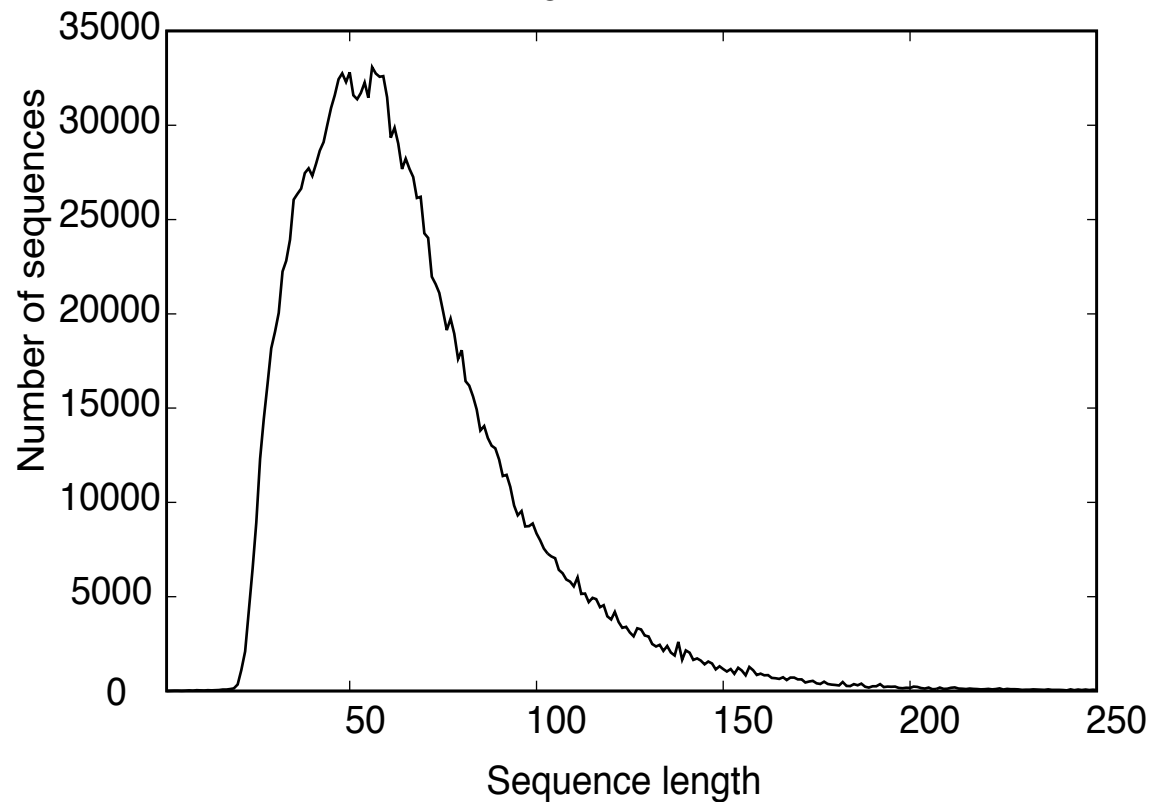

Aligned fragments (MG18)

length  $\geq 35$ bp & map quality  $\geq 30$

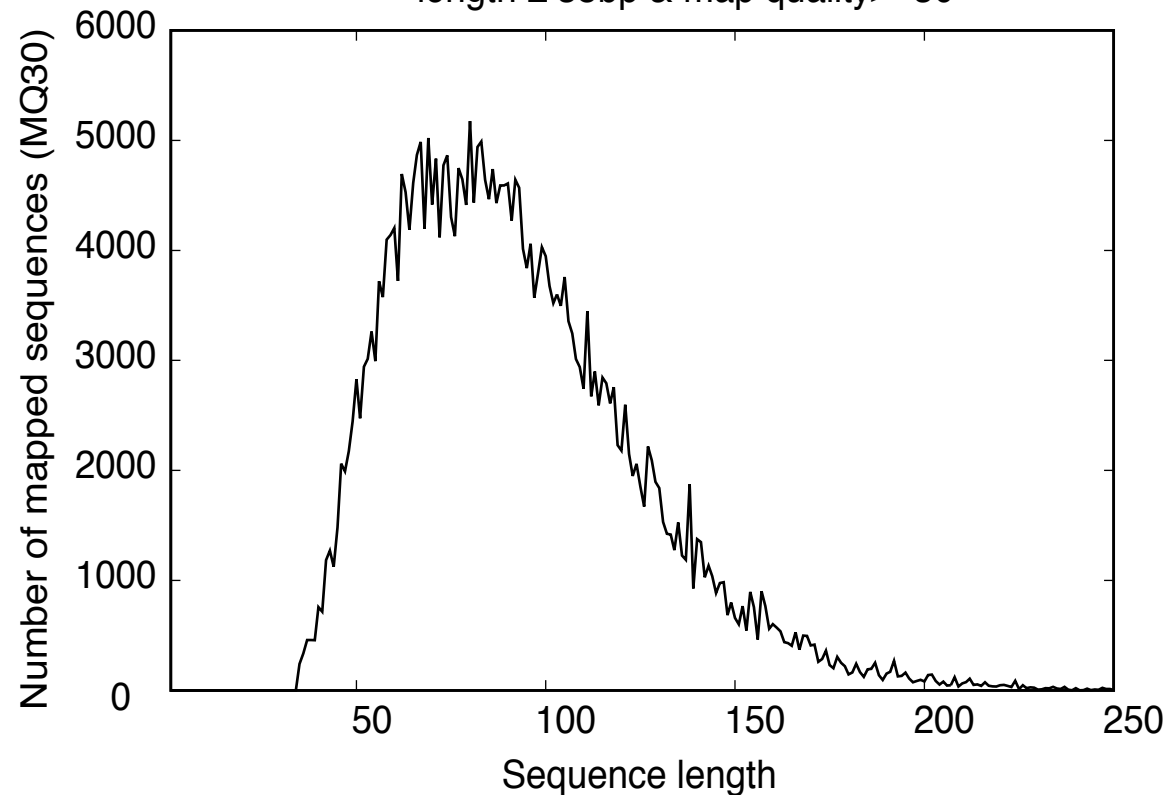

(b)

Total fragments (MG48)

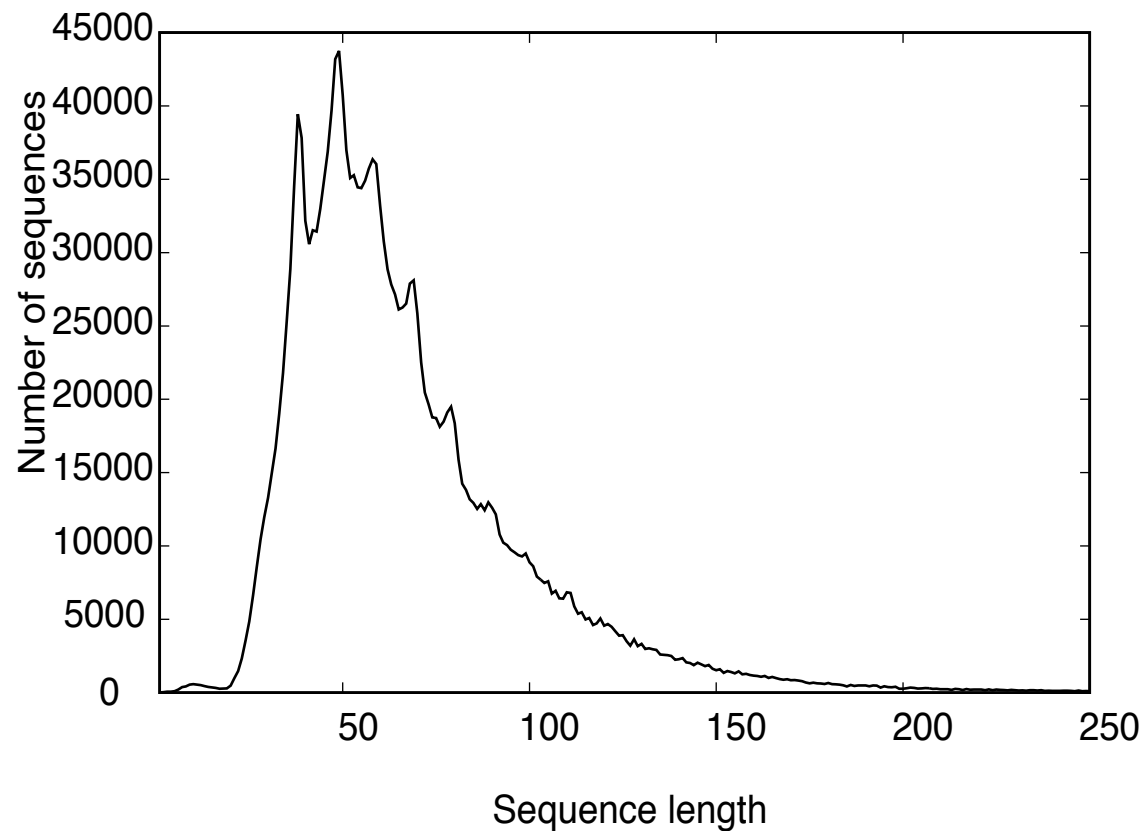

Aligned fragments (MG48)

length  $\geq 35$ bp & map quality  $\geq 30$

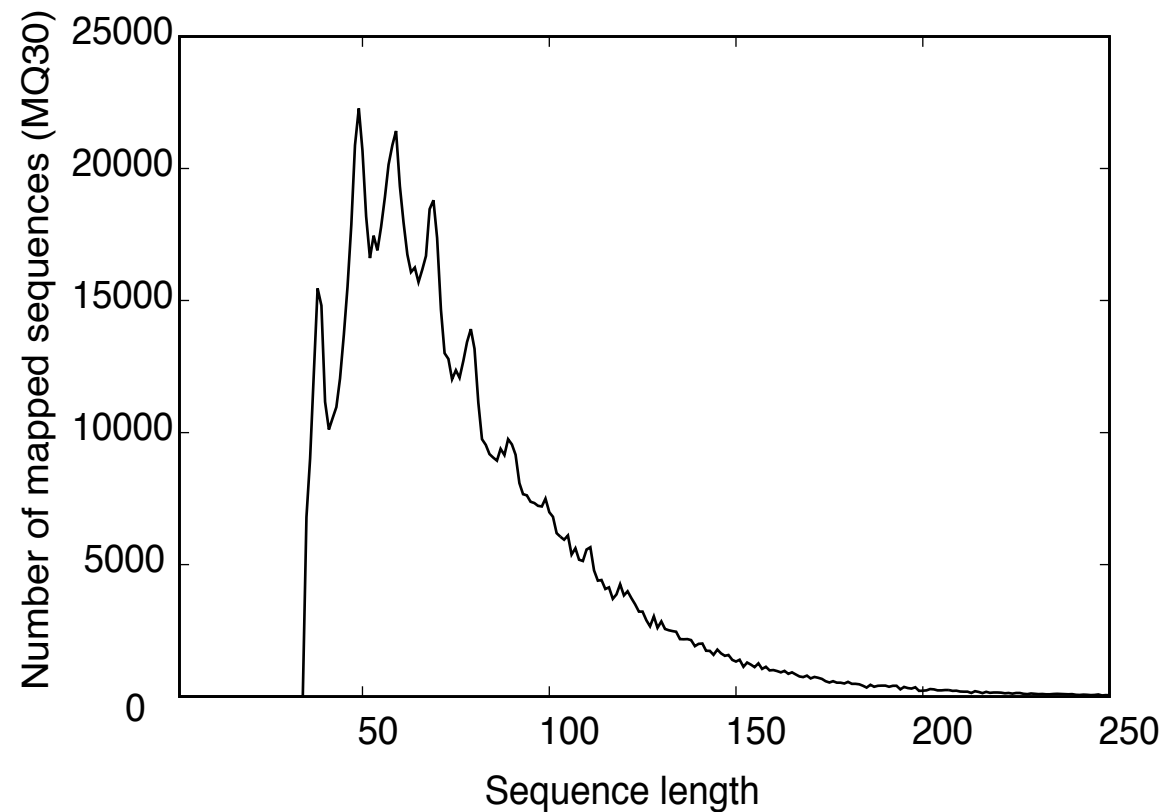

Supplement: 12862_2017_1082_MOESM4_ESM.pdf [file 12862_2017_1082_MOESM4_ESM.pdf]
